# Supplementary material for: Gold-modified silver nanorod arrays for SERS-based immunoassays with improved sensitivity
Source: Royal Society of Chemistry journal article supplement (doi:10.1039/c4tb01207k), 2014-01-01
Supplement: c4tb01207k1.pdf [file c4tb01207k1.pdf]

## Supporting information

### Gold-modified silver nanorod arrays for SERS-based immunoassays with improved sensitivity

Chunyu Song<sup>1,2,3\*</sup>, Jing Chen<sup>3,4</sup>, Yiping Zhao<sup>2,3</sup>, and Lianhui Wang<sup>1\*</sup>

Corresponding authors.

E-mail: iamcysong@njupt.edu.cn Phone: +86-25-85866332 Fax: +86-25-85866332

iamlhwang@njupt.edu.cn Phone: +86-25-85866333 Fax: +86-25-85866333

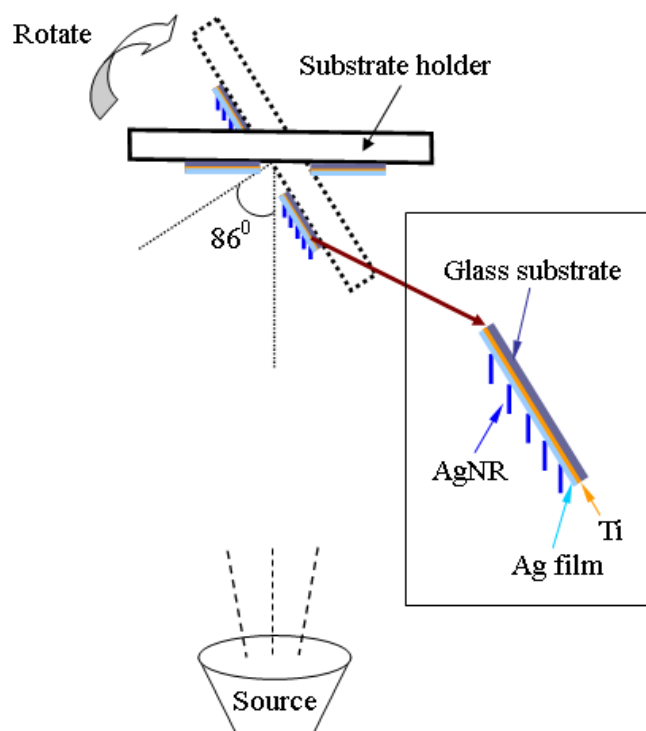

**Figure. S1** Oblique angle deposition (OAD) for the fabrication of silver nanorod (AgNR) arrays.

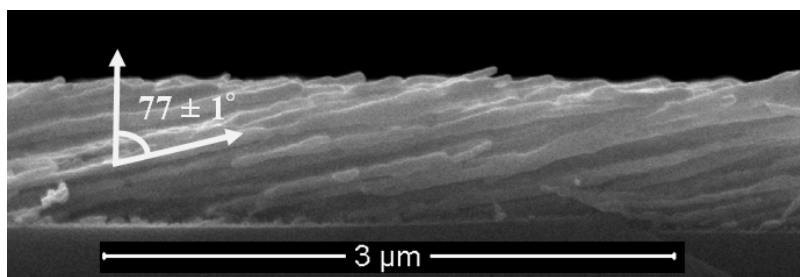

Figure. S2 Cross-section view SEM image of the AgNR array.

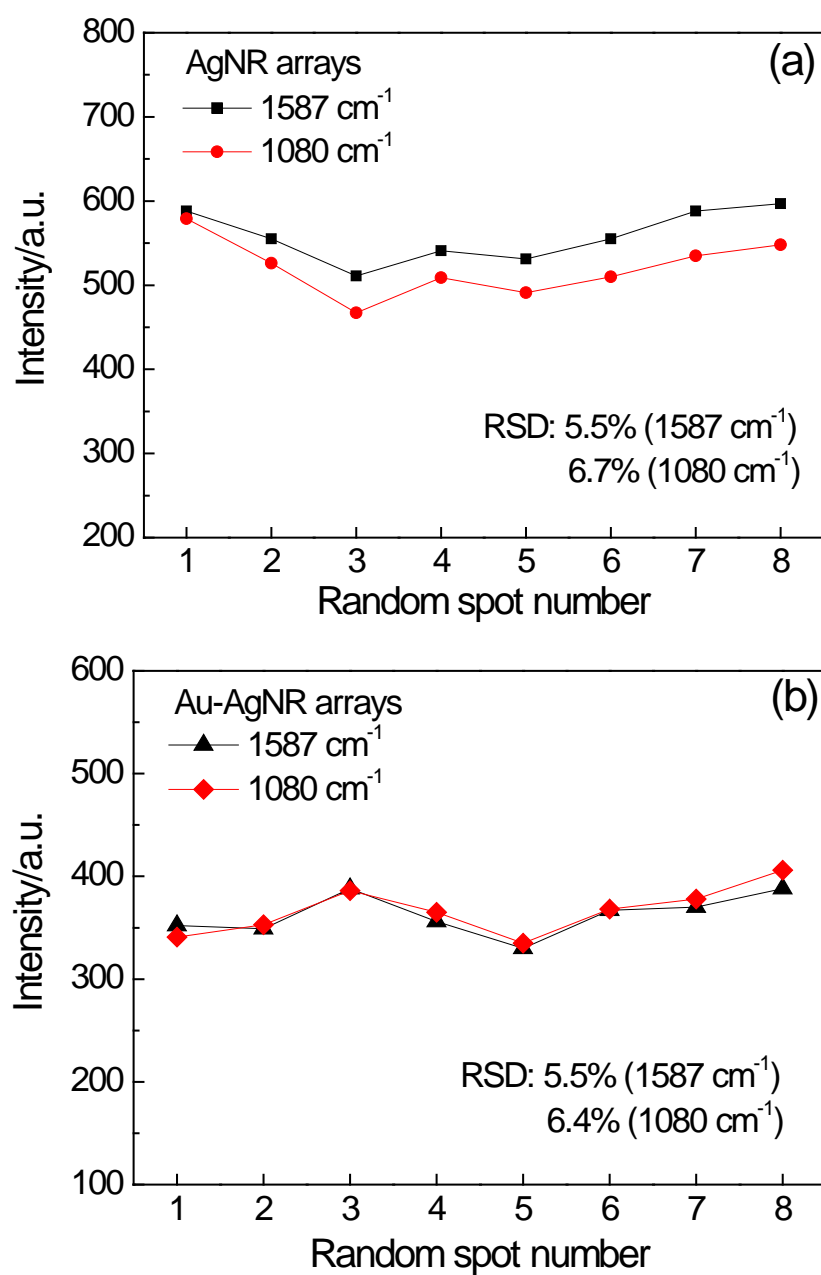

Figure. S3 Peak intensities of 4-MBA at 1587 cm<sup>-1</sup> and 1080 cm<sup>-1</sup> on the AgNR and Au-modified AgNR substrates. All intensities were averaged from 8 spectra collected from 8 random locations on the substrates.

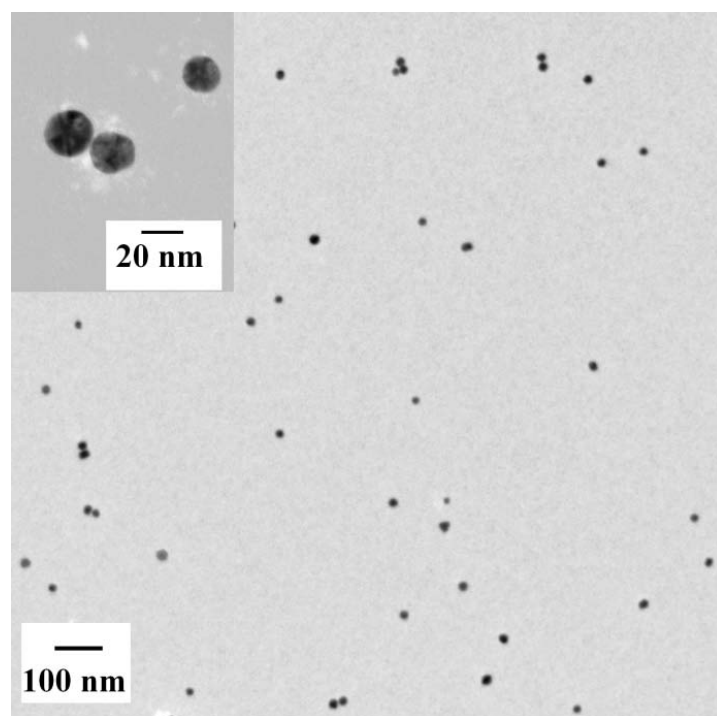

**Figure. S4** TEM image of colloidal gold.

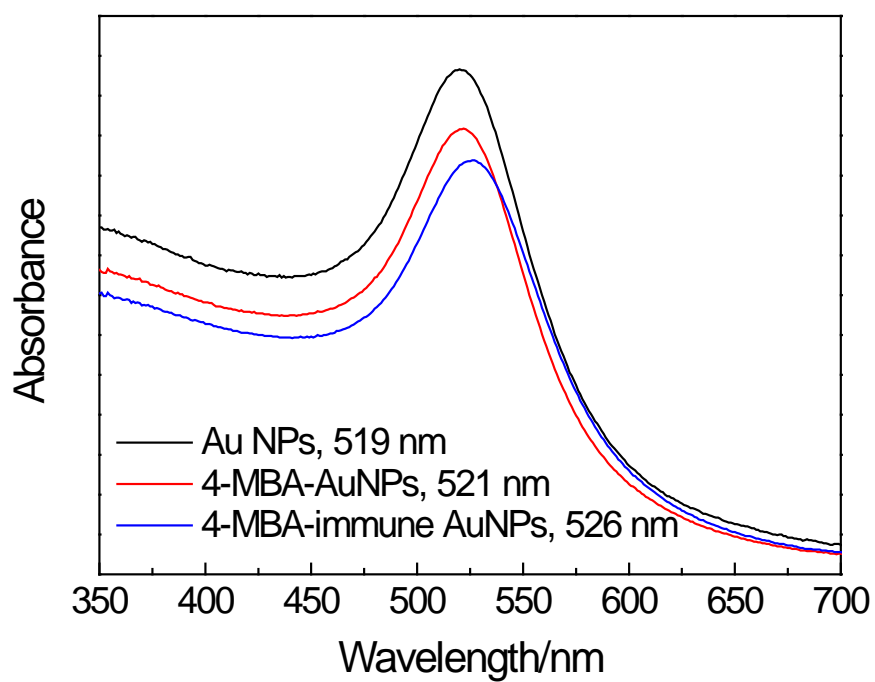

**Figure. S5** Optical properties of AuNPs (black), 4-MBA-labeled AuNPs (red), and 4-MBA-immune AuNPs (blue).

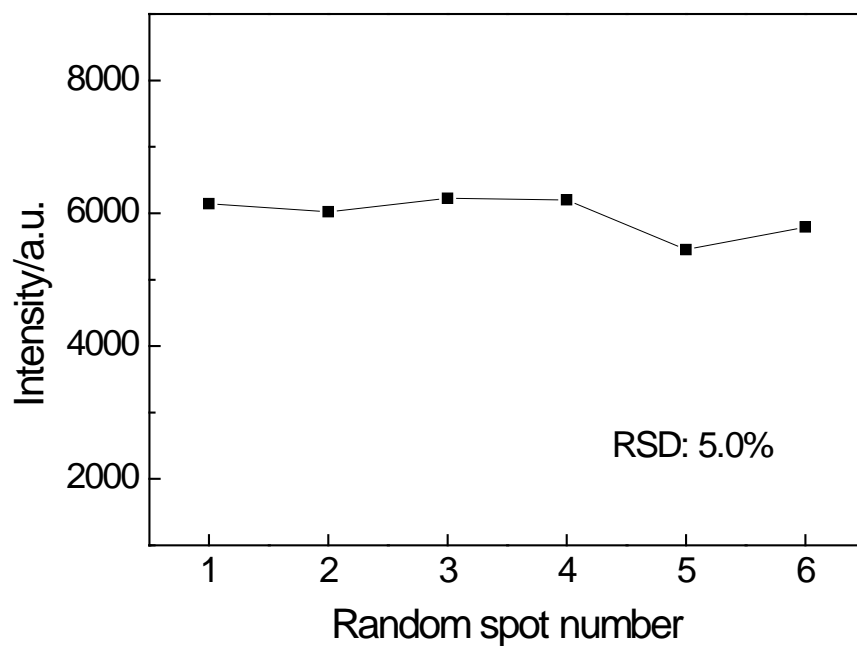

**Figure. S6** Peak intensities at 1080 cm<sup>-1</sup> on six random locations on the Au-modified AgNR substrate.

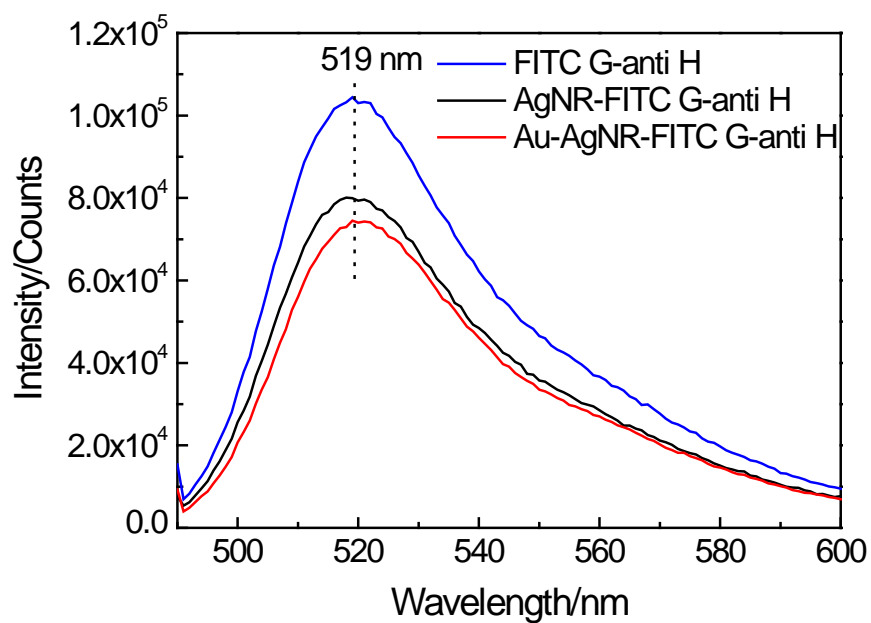

**Figure. S7** Fluorescence spectra of FITC-labeled goat anti-human IgG solution (blue), residual soaking solutions for the AgNR (black) and Au-modified AgNR (red) substrates.

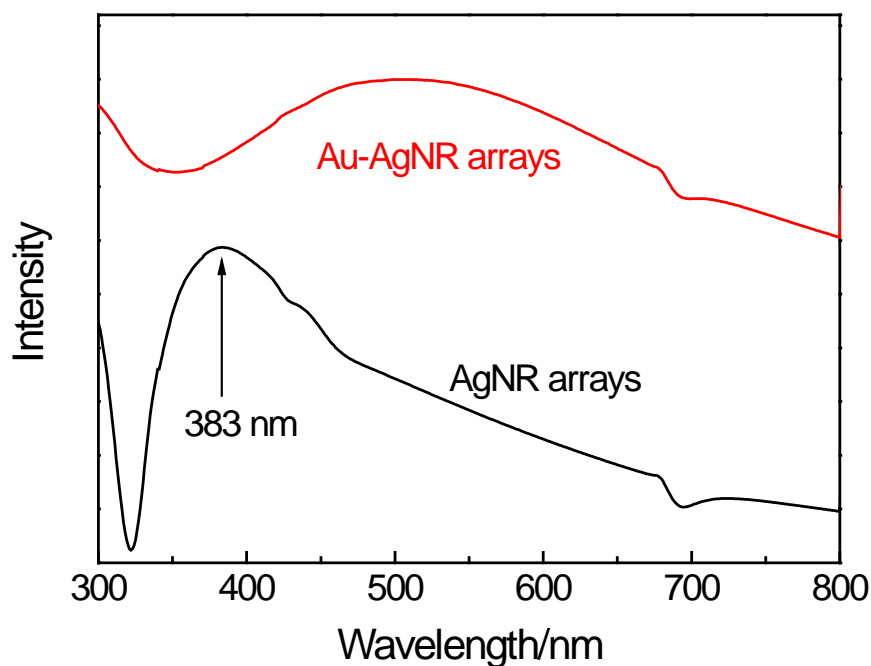

**Figure. S8** Optical properties of the AgNR arrays and Au-modified AgNR arrays without the underlying Ag film. The optical absorbance spectra were collected by a JASCO (Easton, MD) V-570 UV/Vis/NIR double beam spectrophotometer with a clean glass slide as a reference.

**Table S1.** Summary of the reported sandwich structured SERS immunoassays for IgG

| SERS tags                               | Substrate                                | Sensitivity | Ref.         |
|-----------------------------------------|------------------------------------------|-------------|--------------|
| gold nanospheres (30 nm)                | gold film (thickness 300 nm)             | 30 ng/mL    | 9            |
| gold aggregates                         | silver nanoparticles assembled substrate | 100 fg/mL   | 21           |
| gold/silver core-shell nanorods         | glass slide                              | 70 fM       | 39           |
| truncated octahedral gold nanoparticles | glass slide                              | 36.56 fg/mL | 38           |
| gold nanostar aggregates                | gold nanostars assembled substrate       | 10 fg/mL    | 23           |
| gold nanospheres (18 nm)                | gold-modified silver nanorod array       | 2.5 fg/mL   | current work |
